# Supplementary material for: Exploring the Chemical Constituents, Antioxidant, Xanthine Oxidase and COX Inhibitory Activity of Commiphora gileadensis Commonly Grown Wild in Saudi Arabia
Source: MDPI journal article supplement (doi:10.3390/molecules28052321), 2023-03-02
Supplement: s1 [file s1]

Article

# Exploring the Chemical Constituents, Antioxidant, Xanthine Oxidase and COX Inhibitory Activity of *Commiphora gileadensis* Commonly Grown Wild in Saudi Arabia

Khalid A. Shadid <sup>1</sup>, Ashok K. Shakya <sup>1,\*</sup>, Rajashri R. Naik <sup>2</sup>, Talal S. Al-Qaisi <sup>2</sup>, Ghaleb A. Oriquat <sup>2</sup>, Ali M. Atoom <sup>2</sup> and Husni S. Farah <sup>2</sup>

<sup>1</sup> Pharmacological and Diagnostic Research Center, Department of Pharmaceutical Sciences, Faculty of Pharmacy, Al-Ahliyya Amman University, Amman-19328, Jordan

<sup>2</sup> Pharmacological and Diagnostic Research Center, Faculty of Allied Medical Sciences, Al-Ahliyya Amman University, Amman-19328, Jordan

\* Correspondence: ak\_shakya@ammanu.edu.jo; Tel: +962-5-3500211 (ext. 2135)

## Supplementary Material

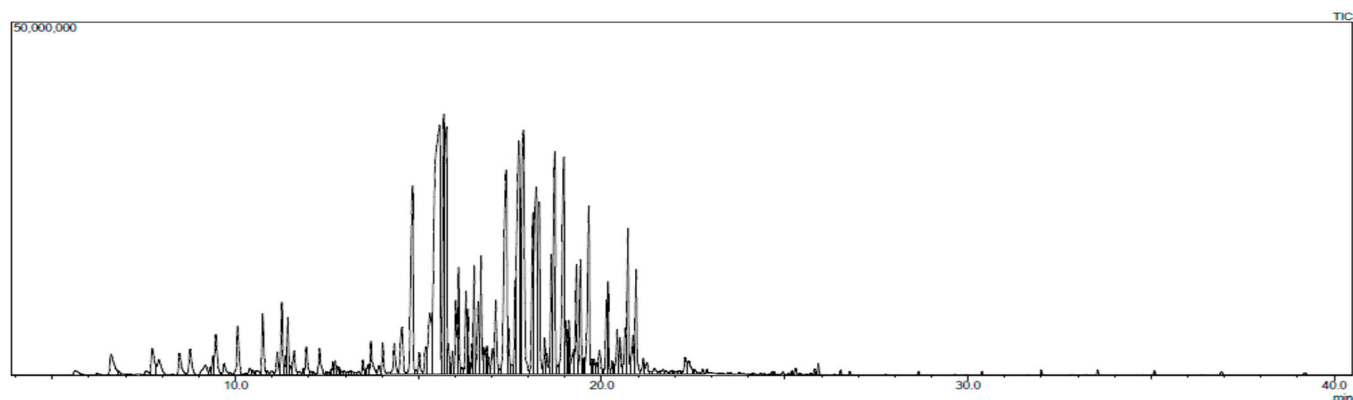

**Figure S1.** GC-MS analysis of ethanolic extract of aerial parts of *Commiphora gileadensis*.

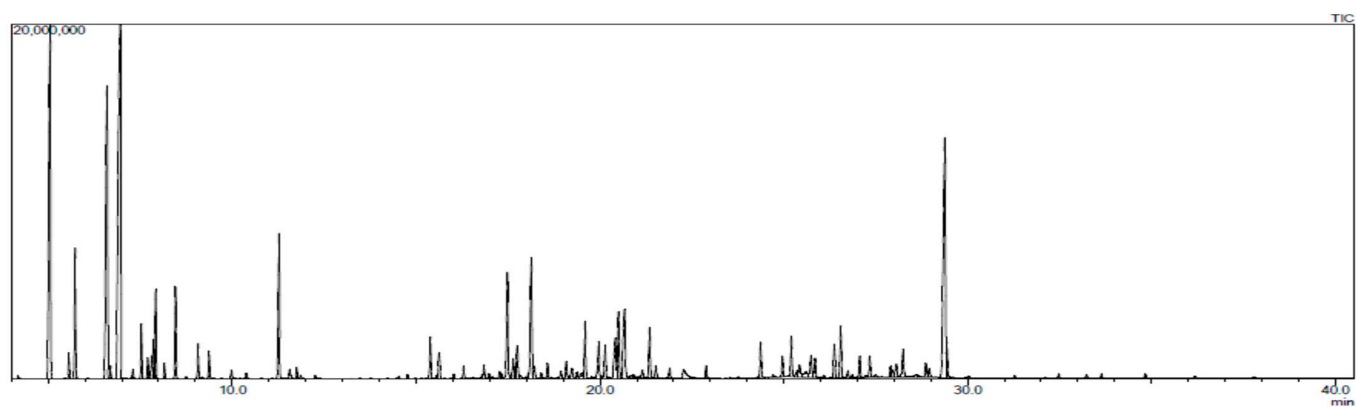

**Figure S2.** GC-MS analysis of Essential oil collected from aerial parts of *Commiphora gileadensis*.
